## Local brainstem circuits contribute to reticulospinal output in the mouse

Jeremy W. Chopek<sup>1,2,3</sup>, Ying Zhang<sup>1</sup>, Robert M Brownstone<sup>2</sup>

1. Department of Medical Neuroscience, Faculty of Medicine, Dalhousie University, Halifax, Nova Scotia, Canada, B3H 4R2
2. Department of Neuromuscular Diseases, UCL Queen Square, Institute of Neurology, University College London, London, UK, WC1N 3BG
3. Department of Physiology and Pathophysiology, Rady Faculty of Health Sciences, University of Manitoba, Winnipeg, Manitoba, Canada, R3E OJ9

\*Correspondence to:

Jeremy Chopek

[Jeremy.chopek@umanitoba.ca](mailto:Jeremy.chopek@umanitoba.ca)

Or

Robert Brownstone

[r.brownstone@ucl.ac.uk](mailto:r.brownstone@ucl.ac.uk)

Abbreviated title: Intrinsic microcircuits in the reticular formation

Number of pages = 26

Number of figures = 6

Number of words for abstract (n=145), introduction (n=639), and discussion (n=1411)

**CONFLICT OF INTEREST:** The authors declare no competing interests.

**ACKNOWLEDGEMENTS:** We thank Dallas Bennett and Charlotte Ryder-Burbridge for animal care and technical support, and Dr Xiaolu Sun for her preliminary experimental work. This work was funded by the Canadian Institutes of Health Research (RMB: MOP 136981; YZ: MOP-110950) and Wellcome Trust (RMB: 110193). RMB's position is supported by Brain Research UK. Equipment used for photostimulation experiments was funded by the Canadian Foundation for Innovation (228190, RB) and the Nova Scotia Research and Innovation Trust (RB).

1 **ABSTRACT**

2 Glutamatergic reticulospinal neurons in the gigantocellular reticular nucleus (GRN) of the  
3 medullary reticular formation can function as command neurons, transmitting motor commands  
4 to spinal cord circuits. Recent advances in our understanding of this neuron-dense region have  
5 been facilitated by the discovery of expression of the transcriptional regulator, Chx10, in  
6 excitatory reticulospinal neurons. Here, we address the capacity of local circuitry in the GRN to  
7 contribute to reticulospinal output. We define two sub-populations of Chx10-expressing neurons  
8 in this region, based on distinct electrophysiological properties and somata size (small and large),  
9 and show that these correspond to local interneurons and reticulospinal neurons, respectively.  
10 Using focal release of caged-glutamate combined with patch clamp recordings, we demonstrated  
11 that Chx10 neurons form microcircuits in which the Chx10 interneurons project to and facilitate  
12 the firing of Chx10 reticulospinal neurons. We discuss the implications of these microcircuits in  
13 terms of movement selection.

14

15 **SIGNIFICANCE STATEMENT** (<120 words)

16 Reticulospinal neurons in the medullary reticular formation play a key role in movement. The  
17 transcriptional regulator Chx10 defines a population of glutamatergic neurons in this region, a  
18 proportion of which have been shown to be involved in stopping, steering, and modulating  
19 locomotion. While it has been shown that these neurons integrate descending inputs, we asked  
20 whether local processing also ultimately contributes to reticulospinal outputs. Here, we define  
21 Chx10-expressing medullary reticular formation interneurons and reticulospinal neurons, and  
22 demonstrate how the former modulate the output of the latter. The results shed light on the  
23 internal organization and microcircuit formation of reticular formation neurons.

## 24 INTRODUCTION

25 Movement is complicated. When we reach and grasp our coffee cup, we instruct our  
26 spinal cords to activate particular muscle groups in a precise temporal sequence. At the same  
27 time, we instruct it to not supinate our forearm. This combination of instructions to move and to  
28 not move are thus required for behavioural output. While the basal ganglia are involved in  
29 making these selections (Tecuapetla et al., 2016; Lee et al., 2020), it is the brainstem reticular  
30 formation that must ultimately decode these supramedullary inputs to form precise commands  
31 that descend, via reticulospinal pathways, to spinal motor circuits.

32 It is well established that the gigantocellular reticular nucleus (GRN) contains  
33 reticulospinal neurons that mediate posture and locomotion in the cat (Takakusaki et al., 2003;  
34 Matsuyama et al., 2004; Schepens and Drew, 2004). Neurons in supramedullary locomotor  
35 regions such as the mesencephalic (MLR) and cerebellar locomotor regions project to the GRN,  
36 where they are integrated to initiate locomotion via reticulospinal pathways that in turn activate  
37 spinal locomotor circuits (Orlovsky, 1970; Noga et al., 2003). Electrical (Jordan et al., 2008) or  
38 chemical (Noga et al., 1988) activation of glutamatergic RSNs in the GRN is sufficient for  
39 inducing locomotor activity, and inactivation (Noga et al., 2003) of this region eliminates MLR-  
40 evoked locomotion. But glutamatergic RSNs are involved in other movement as well: for  
41 example, these neurons also receive input from postural centres to ensure appropriate extensor  
42 tone during motor activities (see review: Takakusaki, 2017).

43 The GRN is comprised of various types of neurons, including inhibitory as well as  
44 excitatory reticulospinal neurons (Du Beau et al., 2012; Mitchell et al., 2016; Valencia Garcia et  
45 al., 2018), and is not seemingly structurally organised in a way that would facilitate the study of  
46 different neuronal types. Mouse genetic techniques have therefore been used to identify and

47 activate (or inactivate) neurons in this region to study their roles. In recent years, neurons in the  
48 GRN that express the transcriptional regulator Chx10 have been studied (Crone et al., 2012;  
49 Bretzner and Brownstone, 2013). As in the spinal cord, these neurons are exclusively  
50 glutamatergic (Bretzner and Brownstone, 2013; Bouvier et al., 2015). Promoters for either the  
51 vesicular glutamate transporter 2 (vGluT2), or Chx10 have been used to drive cre recombinase  
52 expression for opto- or chemo- genetic experiments. Using these techniques, it has become clear  
53 that excitatory GRN neurons can modulate locomotor activity (Lemieux and Bretzner, 2019),  
54 that bilateral activation of Chx10 RF neurons can stop locomotion (Bouvier et al., 2015), and that  
55 their unilateral stimulation can lead to turning (Cregg et al., 2020) or neck movements (Capelli et  
56 al., 2017) or both (Usseglio et al., 2020). But glutamatergic neurons in this region are also  
57 involved in sleep atonia (Saper et al., 2010), suggesting that results from photoactivation  
58 experiments could be skewed by the subpopulation(s) of neurons activated. But it is likely that,  
59 similar to the heterogeneity of spinal Chx10 interneurons (e.g. Dougherty et al., 2013; Hayashi et  
60 al., 2018), Chx10 reticular formation neurons are also not homogeneous. Furthermore, opto- or  
61 chemo- genetic studies would not capture the intrinsic organisation of the GRN, and whether  
62 local circuits regulate the output – that is, whether this region is simply an integrator of inputs, or  
63 whether it has the circuitry to refine descending output.

64         In a step towards understanding this black box region of the brain and how it might  
65 process input from above to produce descending commands for spinal cord circuits to process,  
66 we asked whether Chx10 neurons in the GRN form local microcircuits. We identified two clear  
67 subsets of these neurons, only one of which (comprised of neurons with large somata) is  
68 reticulospinal. Then, using focal release of caged glutamate, we demonstrated the internal  
69 architecture whereby smaller Chx10 neurons project to and facilitate the firing of the larger

70 Chx10 neurons. We propose that these microcircuits tune descending commands and thus  
71 facilitate movement.

## 72 MATERIALS AND METHODS

### 73 Animals

74 All animal procedures were done at Dalhousie University, approved by the University  
75 Committee on Laboratory Animals and conform to the standards of the Canadian Council for  
76 Animal Care. Both male and female Chx10::eGFP were used in all experiments.

### 77 Electrophysiology

78 *Slice preparations.* Whole-cell patch clamp recordings were made from visualized Chx10  
79 neurons from the gigantocellular reticular nucleus (GRN) of the rostral medulla of P9-P14  
80 Chx10e:GFP mice (Bretzner and Brownstone, 2013). Mice were anesthetized by intraperitoneal  
81 injection of a ketamine (60 mg/kg) and xylazine (12 mg/kg). After loss of their righting reflex,  
82 mice were cooled on ice and decapitated. The brainstem was immediately removed and secured  
83 to an agar block with a small amount of adhesive and transferred to ice-cold oxygenated solution  
84 (3.5mM KCL, 35mM NaHCO<sub>3</sub>, 1.2mM KH<sub>2</sub>P0<sub>4</sub>, 1.3mM MgSO<sub>4</sub>, 1.2mM CaCl<sub>2</sub>, 10mM glucose,  
85 212.5mM sucrose, 2mM MgCl<sub>2</sub>, pH7.4) for sectioning. Two, 300-350 um sections of the  
86 medulla containing the rostral GRN were sectioned on a vibratome (Leica VT1200S, Leica) per  
87 mouse and transferred to a warm oxygenated (95% oxygen, 5% carbon) aCSF solution (111 mM  
88 NaCl, 3.08 mM KCl, 11 mM Glucose, 25 mM NaHCO<sub>3</sub>, 1.25 mM MgSO<sub>4</sub>, 2.52 mM CaCl<sub>2</sub>, 1.18  
89 mM KH<sub>2</sub>p0<sub>4</sub>, pH 7.4) to recover for a minimum of 30 minutes.

90 *Whole-cell patch-clamp recordings and stimulation.* Slices were transferred to a recording  
91 chamber mounted on a Zeiss AxioExaminer microscope and perfused with oxygenated room-  
92 temperature aCSF. Cells were visualized using a 20x wide aperture (1.2nA) water-immersion  
93 objective lens, a CCD camera (CoolSNAP EZ CCD Camera, Photometrics, Arizona, USA) and  
94 Slidebook 6.0 software (Intelligent Imaging Innovations, Colorado, USA, RRID:SCR\_014300).

95 Whole-cell patch-clamp recordings were acquired in current-clamp (IC) mode using a  
96 Multiclamp 700B amplifier (Molecular Devices, California, USA, RRID:SCR\_014300).  
97 Recordings were loss pass filtered at 10 kHz (IC), and acquired at 25 kHz with CED Power1401  
98 AD board and Signal software (CED, Cambridge UK, <http://ced.co.uk/us/products/sigovin>).

99 Recording pipettes were filled with a solution containing in mM: K-gluconate, 128; NaCl, 4;  
100 CaCl<sub>2</sub>, 0.0001; Hepes, 10mM, glucose, 1mM; Mg-ATP, 5; and GTP-Li, 0.3, pH 7.2, lucifer  
101 yellow dilithium salt (0.4 mg/ml, Thermo Fisher Scientific, Cat# A-5750, RRID:AB\_2314410),  
102 and neurobiotin (1mg/ml, Vector Laboratories, Cat# SP-1120-20, RRID: AB\_2536191), and had  
103 resistances of 4-6 MΩ. Lucifer yellow allowed for the immediate visualization of the soma and  
104 dendrites of the patched cell. This allowed us to avoid photostimulating processes of the  
105 recorded cell whilst stimulating nearby presynaptic cell bodies. Neurobiotin allowed for *post-*  
106 *hoc* confirmation of the identity of the recorded cell and that axons or dendrites of the post-  
107 synaptic cell were not stimulated when photostimulating pre-synaptic cell bodies by comparing  
108 images of the region of interest (ROIs) stimulated (see below) to the confocal image of the  
109 biotin-filled post-synaptic cell (n=10).

110 In the initial set of experiments, basic and rhythmic firing properties of visually identified  
111 “large” and “small” Chx10 neurons in the medulla GRN were subjected to various depolarizing  
112 and hyperpolarizing current pulses. All properties were collected while holding the cell at -60  
113 mV. Input resistance was collected as the average response of the cell to repetitive (minimum 20  
114 sweeps), small hyperpolarizing pulses (-10pA, 100ms). Rheobase, defined as the minimum  
115 current to elicit an action potential 50% of time was collected from incremental 1 pA  
116 depolarizing current steps. Voltage threshold defined as the membrane potential at which  
117 depolarization increased at  $\geq 10$  V/s was determined from the first spiking response during  
118 rheobase. Frequency-current (F-I) plots were obtained by applying 1 second depolarizing  
119 current pulses with incremental increase of 10-20 pA. The steady state firing frequency was  
120 determined by counting the number of spikes during the 1 second pulse. The instantaneous  
121 firing frequency was collected by taking the average interspike interval (1/average interspike  
122 interval) of the first 3 spikes for each current step. Sag potential and post inhibitory rebound  
123 firing was collected during 1 second hyperpolarizing current pulses with increases of -10 to -20  
124 pA. Sag potential was collected as the difference in the membrane potential at maximum minus  
125 steady state change during the hyperpolarizing pulse. All sag calculations were conducted at a  
126 steady state hyperpolarization of -100 mV.

## 127 **Holographic photolysis of caged glutamate**

128           Following the initial set of experiments to characterize the electrophysiological properties  
129 of large and small Chx10 neurons, we sought to determine the connectivity patterns of Chx10  
130 neurons using a photo-stimulation protocol as we have previously described. These experiments  
131 only proceeded when membrane potential was stable (i.e. did not fluctuate more than 5 mV  
132 during a 5-minute period). MNI-caged-L-glutamate (2.5mM, Tocris, Ontario, Canada, Cat#  
133 1490) was perfused in warm aCSF at a rate of 2ml/min. Holographic photolysis of MNI-  
134 glutamate was performed using a 405 nm laser directed through a Phasor spatial light modulator  
135 (SLM) system (Intelligent Imaging Innovations, Colorado, USA), stimulating regions of interest  
136 (ROI) as controlled by Slidebook software. Prior to photostimulating ROIs, direct  
137 photostimulation of the patched Chx10 neuron was performed to determine the intensity and  
138 duration of the pulse which elicited a single action potential. Ideal intensity and pulse duration  
139 for small Chx10 neurons was 3.5mW and 800-1000  $\mu$ s and for large Chx10 neurons was 7mW  
140 and 1500  $\mu$ s. If longer durations were necessary, the slice was not used as it was deemed to be  
141 unhealthy. ROIs were selected as identified neuronal cell bodies under fluorescence, with the  
142 ROI blanketing the soma. Once ROIs in a single focal plane were selected, sequential  
143 photostimulation of the ROIs was carried out while recording from the post-synaptic neuron.  
144 Post-synaptic cells were held between -60mv and -50mv for the duration of the experiment  
145 (which could exceed one hour). Photomicrographs for each ROI were taken to map the location  
146 of each cell relative to the post-synaptic cell recorded. In stable preparations, once a connection  
147 was established, a second electrode was used to record from the connected pre-synaptic cell to  
148 determine if the connection was bi-directional. As the connected cells were often in close  
149 proximity (100-200  $\mu$ m), the gigaseal of the patch-clamp was often lost on one of the two cells,  
150 but loose patch recordings were obtained, confirmed by recording responses from direct  
151 photostimulation of the cell body.

## 152 **CTB injections.**

153 The fluorescent retrograde tracer cholera toxin subunit B (CTB) was used to label reticulospinal  
154 neurons. Briefly, using aseptic surgery with 3-4% isoflurane, an incision over the cervical or  
155 lumbar spine was made, the lamina over C6 or L2 was removed, and a small incision in the dura  
156 was made to expose the spinal cord. Mice were placed in a stereotaxic frame to stabilize the  
157 vertebral column, and, using a micromanipulator a glass pipette containing 1  $\mu$ L of CTB was



158 advanced to the surface of the spinal cord, following which the tip was slowly lowered 500  $\mu\text{m}$   
159 into the L2 spinal cord. CTB was injected over a 10 minute period and the pipette remained in  
160 place for 5 minutes after injection, after which, the electrode was removed and a similar  
161 injection with a new glass electrode was made on the contralateral side of the spinal cord. The  
162 mice were then sutured and monitored while they recovered. No deficits or motor impairments  
163 were seen as mice recovered. At day 14 after injection, the mice were anesthetized and  
164 transcordially perfused with phosphate buffer solutions followed by 4% paraformaldehyde in  
165 0.1M phosphate solution (PBS). Tissue was harvested, post-fixed in 4% paraformaldehyde  
166 overnight, and subsequently cryoprotected in 30% sucrose. Tissue was sectioned using a cryostat  
167 and mounted on glass slides for immunohistochemistry.

### 168 **Immunohistochemistry and imaging.**

169 Upon completion of the electrophysiological recordings, slices were incubated in 4%  
170 paraformaldehyde for 1 hour at room temperature followed by three, 15 minute washes in 0.1%  
171 PBS-T. Slices were incubated at 4°C overnight in goat anti-GFP primary antibody (1:2500,  
172 Abcam Cat# AB6673, RRID: AB\_305643) followed by a four-hour incubation period in donkey  
173 anti-goat Alexa Fluor 488 (1:500, Abcam Cat# AB150105, RRID: AB\_2732856) and Alexa  
174 Fluor 647-conjugated streptavidin (1:500, ThermoFisher Scientific, Cat# S-21374, RRID:  
175 AB\_2336066). Images were obtained using a Zeiss LSM 510 upright confocal microscope.  
176 Images were compared to photos obtained during the electrophysiology recordings in Slidebook  
177 to confirm that the ROIs did not overlap with visually identifiable dendrites or axons.

178 For CTB-labeled tissue, sections were incubated with primary goat anti-GFP (1:500,  
179 Abcam, Cat# AB5449, RRID: AB\_304896) and sheep anti-Neun (1:1000, Abcam Cat#  
180 AB177487, RRID: AB\_2532109) antibodies diluted in PBS containing 0.1% Triton X-100  
181 (PBS-T) for 24 hours at 4 °C. Sections were then washed three time for 10 mins each in 0.1%  
182 PBS-T followed by incubation with appropriate secondary antibodies conjugated to Alexa 488,  
183 Alexa 555 and Alexa 637 (1:500 Molecular Probes) for 3 hours. Sections were then washed  
184 three times for 10 mins each in PBS, mounted in vectashield (Vector Laboratories) and  
185 coverslipped. Epifluorescent images were acquired with a Zeiss Axioplan inverted microscope.  
186 Images were processed using ImageJ software (NIH, USA). Cell areas ( $\mu\text{m}^2$ ) were measured at

187 optical planes that included the nucleus, and were calculated using surface area function in  
188 ImageJ

### 189 **Experimental design and statistical analysis**

190 Data are presented as mean  $\pm$  SD. As is common for discovery experiments, no  
191 statistical method was used to predetermine sample size, and no randomization or blinding  
192 procedures were used. Statistical analyses were done using Sigma-Plot (v14.0, Systat software,  
193 California, USA). Un-paired Student's t test were used for all comparisons except for frequency  
194 of observed sag potentials, in which Fisher Exact test was used. Statistical significance was set  
195 at  $p < 0.05$ .

## 196 **RESULTS**

### 197 **Chx10 neurons have distinct electrophysiological properties correlated to their size**

198 As intrinsic neuronal electrophysiological properties play a critical role in producing  
199 circuit activity (Getting, 1989), we first sought to characterize these properties of medRF Chx10  
200 neurons, focusing on those in the GRN. We performed whole-cell patch-clamp recording from  
201 Chx10 neurons in P9-P14 mice to determine if there are subpopulations of Chx10 neurons with  
202 distinct electrophysiological properties. All neurons were held at -60 mV to have a uniform  
203 baseline when measuring their responses to injected current.

204 We first characterized the spike patterns of Chx10 neurons in response to sustained  
205 suprathreshold current steps. Of the 60 neurons we recorded, 48 demonstrated sustained firing in  
206 response to current injection, whereas the remaining 12 fired only a single spike and were not  
207 analysed further. Of the 48 neurons with sustained firing, two distinct patterns of firing emerged.  
208 The first pattern (n=26) consisted of trains of action potential with minimal spike frequency  
209 adaptation (SFA) and lower initial gain in the F/I relationship (Figures 1A & 1B). The second  
210 pattern (n=22) consisted of high initial firing rate followed with pronounced spike frequency  
211 adaptation. The average gain for the initial firing (first 3 spikes) was  $19 \pm 18$  Hz / 10 pA for the  
212 first pattern of firing Chx10 neurons and  $36 \pm 28$  Hz / 10pA ( $P = 0.02$ ) for the second type of  
213 firing Chx10 neurons (Figure 1B). There was no significant difference in the average gain for  
214 the steady firing (last 3 spikes), with average gains of  $9 \pm 9$  Hz / 10pA s and  $12 \pm 9$  Hz / 10 pA  
215 respectively (Figure 1B,  $P = 0.08$ ). Furthermore, the second type of firing Chx10 neurons  
216 demonstrated significantly more SFA compared to the first type of Chx10 neurons ( $43 \pm 12$  % vs  
217  $26 \pm 20$  % decrease in firing rates, respectively,  $P = 0.028$ ). Based on these distinct firing  
218 patterns, we termed these neurons Type 1 and Type 2 Chx10 neurons, and then analysed their  
219 corresponding electrophysiological properties (Figure 1C; see below).

220 The two types of Chx10 neurons also demonstrated differences in their responses to  
221 hyperpolarizing current injection to steady state voltages of -100 mV. Of the 26 Type 1 Chx10  
222 neurons, 10 had sag potentials, in response to a hyperpolarizing step to -100 mV, and these  
223 were of small amplitude ( $3.8 \pm 5.1$  mV). None of these neurons responded with post-inhibitory  
224 rebound (PIR) upon termination of this step (Figure 1D). Conversely, all Type 2 Chx10 neurons

225 (n=22) had a large sag potential ( $21.4 \pm 7.5$  mV,  $P < 0.001$ ) in response to hyperpolarization  
226 (Fisher Exact  $P < 0.001$ ), and PIR responses consisted of a single or several action potentials at  
227 pulse termination (Figure 1D). To summarize, we found that Type 1 Chx10 neurons  
228 demonstrated: 1) lower gains in their initial firing F/I relationships, 2) minimal SFA, 3) no sag  
229 potentials, and 4) no PIR, whereas Type 2 Chx10 neurons demonstrated: 1) higher gains in their  
230 initial firing F/I relationships, 2) significant SFA, 3) sag potentials, and 3) PIR responses. Based  
231 on these two distinct types of firing patterns in response to depolarizing and hyperpolarizing  
232 current injections, we proceeded to compare passive electrical properties of these two types of  
233 Chx10 neurons.

234 Both types demonstrated similar resting membrane potentials ( $-46.8 \pm 5.4$  mV and  $-46.2$   
235  $\pm 6.6$  mV, Type 1 and 2 respectively,  $P = 0.73$ ) and spike thresholds ( $-45.2 \pm 6.4$  mV and  $-43.4 \pm$   
236  $3.7$  mV, Type 1 and 2 respectively,  $P = 0.23$ ). However, there was a significant difference in  
237 input resistance with Type 1 demonstrating an average input resistance of  $380 \pm 245$  M $\Omega$  while  
238 Type 2 had an average input resistance of  $980 \pm 480$  M $\Omega$  ( $P < 0.001$ ). Correspondingly, Type 1  
239 Chx10 neurons were less excitable with an average rheobase of  $56.0 \pm 40.8$  pA, compared to  
240 Type 2 Chx10 neurons which had an average rheobase of  $21.0 \pm 7.5$  pA ( $P < 0.001$ ). These 3  
241 properties – input resistance, rheobase, and sag – together led to a separation between Type 1 and  
242 Type 2 Chx10 neurons (Figure 1E).

243 During these recordings, it became visually evident that Type 1 Chx10 neurons were  
244 larger than Type 2 Chx10 neurons (Figure 1A inset). This observation matched their different  
245 rheobases and input resistances. Furthermore, we injected biotin into patched neurons and  
246 analyzed their soma sizes and the number of initial dendritic branches (n=5 for each type). It was  
247 clear that Type 1 Chx10 neurons are significantly larger ( $385 \pm 48$   $\mu$ m vs  $148 \pm 45$   $\mu$ m,  $P$   
248  $< 0.001$ ) and have more primary dendrites ( $3.4 \pm 0.5$  vs  $1.4 \pm 0.5$ ,  $P = 0.004$ ) than Type 2 Chx10  
249 neurons. The difference in soma size fits with a bimodal distribution of Chx10 soma sizes (vide  
250 infra). We therefore refer to these two types of GRN neurons as Large Chx10 neurons and Small  
251 Chx10 neurons, and next sought to determine their connectivity patterns.

## 252 **Large Chx10 neurons are reticulospinal**

253 As Chx10 neurons have previously been shown to be reticulospinal (Bretzner and  
254 Brownstone, 2013 & Bouvier et al., 2015) we sought to determine whether both subpopulations  
255 project to the spinal cord. We initially targeted the L2 spinal cord, where we injected CTB  
256 bilaterally for retrograde labeling in adult Chx10:eGFP mice (n=3, Figure 2A). After a two week  
257 recovery period, we found, on average, 63 (range 35-82) CTB+ GFP<sup>ON</sup> neurons/mouse in the  
258 GRN (Figure 2A). This represented 8-11% of all Chx10<sup>ON</sup> neurons in the GRN, similar to that  
259 reported in neonatal mice (Bretzner & Brownstone, 2013).

260 As a population, Chx10 soma sizes ranged from 80 – 610  $\mu\text{m}^2$  (n= 1925, from 3 mice  
261 mean:  $211 \pm 105 \mu\text{m}^2$ ). In contrast, the range of average soma sizes of CTB positive Chx10  
262 neurons was 240 – 540  $\mu\text{m}^2$  (mean:  $360 \pm 60 \mu\text{m}^2$ ;  $p < 0.01$ ), corresponding with larger Chx10  
263 neuronal soma sizes seen in the frequency distribution (Figure 2B), indicating that the Large  
264 Chx10 neurons are reticulospinal. We found no evidence that the Small Chx10 neurons project to  
265 the lumbar spinal cord.

266 To investigate whether Small Chx10 neurons project to the rostral spinal cord, we  
267 injected CTB in the C7-C8 cervical segments (n=3) and quantified the number of CTB+  
268 Chx10<sup>ON</sup> neurons in the medRF GRN as above. We found a similar distribution of CTB+ Large  
269 Chx10 neurons and no CTB+ Small Chx10 neurons. Thus, Large Chx10 neurons are  
270 reticulospinal whereas Small Chx10 neurons are not. We will therefore refer to the Large Chx10  
271 neurons as Chx10 reticulospinal neurons, and the small ones as Chx10 interneurons.

## 272 **CONNECTIVITY PATTERNS OF CHX10 NEURONS**

273 To determine whether the two populations are synaptically connected with each other, we  
274 used brain stem slice preparations to record from 30 Chx10 neurons (15 of each type), while  
275 photo-activating caged glutamate on over 120 others, establishing 60 connections. We targeted  
276 Chx10 neurons based on their size to ensure that we recorded a sufficient number of each type.  
277 Once entering whole cell mode, we first characterized the neurons based on their  
278 electrophysiological properties (see above), and found a 96% (29/30) concordance rate between  
279 their properties and the predicted type based on size. That is, if we treat our initial data from 48  
280 neurons as a “training” set, then in this “test” set of 30 neurons, we picked their

281 electrophysiological properties correctly in 29. Therefore, we were confident that we could  
282 visually classify neurons as interneurons or reticulospinal neurons for photostimulation. As can  
283 be appreciated by the distribution of cell sizes (Fig 2B), there were many more Chx10  
284 interneurons than reticulospinal neurons. We found that Chx10 interneurons form synapses with  
285 both Chx10 interneurons and Chx10 reticulospinal neurons. Conversely, we did not find  
286 evidence that Chx10 reticulospinal neurons form synapses with other Chx10 reticulospinal  
287 neurons, and connections to Chx10 interneurons were infrequent, although in a subset of pairs,  
288 we found bi-directional connectivity between Chx10 interneurons and Chx10 reticulospinal  
289 neurons. We describe these findings below.

### 290 **Chx10 interneurons form synapses with Chx10 interneurons**

291 After ensuring that photostimulation produced action potentials in Chx10 interneurons by  
292 directly stimulating the recorded cell (Fig 3A), we asked whether Chx10 interneurons connect to  
293 each other. In 15 Chx10 interneurons (average soma size  $176 \pm 40 \mu\text{m}$ ), 20 connections were  
294 found by photostimulation of 70 Chx10 interneurons (Figure 3B). In all 20 connections, the post-  
295 synaptic responses were subthreshold, with differing sizes of excitatory post synaptic potentials  
296 (EPSPs) arising from different presynaptic neurons (Figure 3C). In some cases, temporal  
297 summation with repetitive stimulation was evident (Fig 3C). The number of connected  
298 presynaptic neurons ranged from 1 to 3 (mean  $1.7 \pm 0.9$ ), with EPSP amplitudes ranging from  
299 4.0-12.5 mV (mean  $8 \pm 3 \text{ mV}$ ).

### 300 **No apparent connectivity between Chx10 reticulospinal neurons**

301 We next turned to Chx10 reticulospinal neurons, and asked whether they form synapses  
302 with each other. Due to the large size and high rheobase of Chx10 reticulospinal neurons, higher  
303 photostimulation intensities were needed to generate action potentials in response to the majority  
304 of the individual stimuli (Figure 4A). During recordings in 7 Chx10 reticulospinal neurons, we  
305 photostimulated a total of 40 other Chx10 reticulospinal neurons but were unable to establish  
306 connectivity: there were no responses.

### 307 **Chx10 interneurons form synapses with Chx10 reticulospinal neurons**

308 We next turned to investigating connectivity between the two types of neurons. To study  
309 connectivity from Chx10 interneurons to Chx10 reticulospinal neurons, we photostimulated 75  
310 Chx10 interneurons whilst recording Chx10 reticulospinal neurons ( $n=15$ , soma size  $421 \pm 84$   
311  $\mu\text{m}$ ), and found a total of 32 connections in 14 neurons (Figure 4B). In all 32 connections, the  
312 post-synaptic responses were subthreshold, resulting in small post synaptic EPSPs ( $3.2 \pm 1.2$   
313  $\text{mV}$ , Figure 4C, presynaptic neuron V). The number of connections ranged from 1 to 6  
314 presynaptic neurons, with an average of  $2.5 \pm 1.3$  connections per patched Chx10 reticulospinal  
315 neuron. Conversely, in 5 Chx10 interneurons, we photostimulated a total of 25 Chx10  
316 reticulospinal neurons but were unable to establish any connections, suggesting that connectivity  
317 between the two populations is unidirectional.

318 In a subset of experiments that showed connectivity from a Chx10 interneuron to a  
319 Chx10 reticulospinal neuron ( $n=7$ ), a second patch electrode was used to successfully record the  
320 pre-synaptic Chx10 interneuron, although this often resulted in the loss of the initial giga seal on  
321 the postsynaptic Chx10 reticulospinal neuron. (Figure 4D). In these experiments, action  
322 potentials generated in the Chx10 interneurons by direct photostimulation led to EPSPs in the  
323 Chx10 reticulospinal neurons as expected (Figure 4E). In 5/7 of these experiments,  
324 photostimulation of Chx10 reticulospinal neurons that resulted in generating action potentials in  
325 the Chx10 reticulospinal neurons did not elicit post-synaptic responses in the Chx10  
326 interneurons, supporting that these connections are uni-directional.

327 In two paired recording experiments, however, bi-directional connectivity was found  
328 using current injections into the identified presynaptic Chx10 interneuron and Chx10  
329 reticulospinal neurons (Figure 5A, B), Incremental depolarizing current steps injected in Chx10  
330 interneurons (Figure 5C) that generated action potentials led to EPSPs and action potentials in  
331 Chx10 reticulospinal neurons (light grey and black, figure 5C) at low (light red , figure 5C) and  
332 high (dark red , figure 5C) current injections, respectively. Similarly, current injection in Chx10  
333 reticulospinal neurons (Figure 5D) that generated action potentials also generated EPSPs and an  
334 action potential (light and dark red, figure 5D) in the Chx10 interneuron at low (light grey ,  
335 figure 5D) and high current injections (black, figure 5D), respectively (Figure, demonstrating  
336 that in at least some cases, connectivity is bi-directional.

337 Given this bidirectionality, and given that Cx36 is widely expressed in the medRF GRN  
338 (Westberg et al., 2009; Martin et al., 2011), we sought to determine if these connections could  
339 have an electrical component, by delivering hyperpolarizing current injections. When Chx10  
340 interneurons were hyperpolarized, there was indeed a small hyperpolarizing response in Chx10  
341 reticulospinal neurons (Figure 5E), suggesting an electrical component to this connection.  
342 However, hyperpolarizing current injections in Chx10 reticulospinal neurons failed to elicit a  
343 concomitant response in Chx10 interneurons (Figure 5F). The failure to evoke a hyperpolarizing  
344 response in the Chx10 interneuron could be a result of a rectifying electrically coupled  
345 connection (Rash et al., 2013 & O'Brien, 2014) or could reflect that we were unable to  
346 hyperpolarize the Chx10 reticulospinal neuron sufficiently to detect a response in the Chx10  
347 interneuron, as Chx10 reticulospinal neurons became unstable during sustained  
348 hyperpolarization.

#### 349 **Chx10 interneurons contribute to repetitive firing behaviour of Chx10 reticulospinal** 350 **neurons**

351 To determine the degree to which inputs from Chx10 interneurons impact the firing behavior of  
352 Chx10 reticulospinal neurons, we photostimulated Chx10 interneurons while inducing firing in  
353 Chx10 reticulospinal neurons (n=3). After a connection was established, Chx10 reticulospinal  
354 neurons were subjected to ramp current injections alone and during photostimulation of a  
355 connected Chx10 interneuron (Figure 6A). At its peak, photostimulation could double the firing  
356 rate of the Chx10 reticulospinal neuron, increasing peak firing rate from  $10 \pm 2$  Hz to  $22 \pm 3$  Hz.  
357 Similar increases in firing rate were seen when Chx10 interneurons were photostimulated during  
358 rectangular depolarizing current (Figure 6B). The average firing rate of  $7 \pm 2$  Hz doubled to  $15 \pm$   
359  $4$  Hz during photostimulation of the connected Chx10 interneuron. Interestingly, these induced  
360 firing rates are higher than those seen with maximal current injections into the recorded neurons  
361 (Figure 1, F/I plots). The physiology underlying these photostimulation-induced firing patterns –  
362 acceleration during the stimulus and slow return to baseline – is unclear, but the patterns are  
363 similar to those seen with activation of persistent currents in neuronal dendrites (Heckman et al.,  
364 2003).



## 365 **DISCUSSION**

366 Motor circuits rely on local interneuronal processing to coordinate and regulate  
367 movement. To address the organization of neurons in the medullary reticular formation, a site  
368 critical for movement, we used whole cell patch clamping to record the electrophysiological  
369 properties of Chx10<sup>ON</sup> neurons. We identified two subtypes of Chx10 neurons in the GRN, one  
370 with large somata that is reticulospinal, and the other with smaller somata that functions as local  
371 excitatory interneurons. We then determined their local connectivity patterns using holographic  
372 photolysis of caged glutamate. We found that Chx10 interneurons commonly formed  
373 connections with other Chx10 interneurons as well as with Chx10 reticulospinal neurons, and  
374 that these local interneurons mediate the excitability of the reticulospinal neurons. We propose  
375 that GRN Chx10 interneurons are involved in processing and regulating the input:output  
376 functions of Chx10 reticulospinal neurons.

### 377 **Subtypes of GRN Chx10 Neurons**

378 It is not surprising that the GRN is comprised of heterogeneous neuronal types.  
379 Electrophysiological analysis of neurons in the reticular formation of macaques has similarly  
380 demonstrated several (likely 4) different clusters of neurons based on their firing properties  
381 (Zaaimi et al., 2018). Only one of these clusters was thought to be reticulospinal, suggesting the  
382 presence of other local or ascending neurons. Taken together with our data, it seems likely that  
383 distinct electrophysiological phenotypes in the reticular formation reflect different targets and  
384 functions of the recorded neurons.

385 Chx10, or Vsx2, is a transcriptional regulator that is expressed in some glutamatergic  
386 neurons in both the spinal cord and brain stem, as well as in other sites (e.g. retina). In the spinal  
387 cord, it is expressed in V2a neurons – the excitatory neurons of the cardinal V2 class. It is clear  
388 that spinal V2a neurons, like other cardinal classes (e.g. V0s – Pierani et al., 2001; Zagoraiou et  
389 al., 2009; Talpalar et al., 2013; V1s – Bikoff et al 2016; V2s – Lundfald et al., 2007; Peng et al.,  
390 2007; V3s- Zhang et al., 2008; Borowska et al., 2013; Chopek et al., 2018) are not homogeneous:  
391 for example, a subset of V2a interneurons expresses Shox2 and may regulate burst variability  
392 and pattern during locomotion (Dougherty et al., 2013). And only a subset of V2a neurons in the  
393 cervical spinal cord projects to the brain stem (Hayashi et al., 2018). Likewise, we had

394 previously demonstrated heterogeneity of Chx10<sup>ON</sup> neurons in the reticular formation (Bretzner  
395 & Brownstone 2013). But we now add to this by demonstrating that there are two clear  
396 electrophysiological phenotypes of Chx10<sup>ON</sup> neurons in the GRN, and these phenotypes  
397 correlated with whether or not the neurons had reticulospinal projections.

### 398 **Functional Diversity of Chx10 GRN Neurons**

399 While we have shown that we can readily classify Chx10<sup>ON</sup> GRN neurons into two  
400 populations, there are likely many more sub-classes. In the spinal cord, it is increasingly clear  
401 that genetically defined neuronal populations are not homogenous and that subtypes have  
402 different electrical properties, connectivity and function (Bikoff et al., 2016). Some GRN Chx10  
403 neurons are involved in respiration (Crone et al., 2012; Romer et al., 2017; Jensen et al., 2019),  
404 and others in locomotion. In the rostral GRN, excitation of bilateral Chx10 neurons leads to  
405 halting of locomotion through inhibition of locomotor circuits (Bouvier et al., 2015), and  
406 unilateral excitation leads to turning (Cregg et al., 2020). Recently, two subpopulations of  
407 Chx10<sup>ON</sup> RSNs have been found, with those that project to the cervical cord leading to head  
408 orientation and those to the lumbar cord to hindlimb arrest (Usseglio et al., 2020). Given that we  
409 found relatively homogeneous properties in Chx10<sup>ON</sup> RSNs in the GRN, it may be that the  
410 different functional subtypes are electrophysiologically indistinguishable.

411 What is the role of these neurons in behaviour? In terms of movement, the reticular  
412 formation – and in particular the GRN – has been studied primarily in terms of “command,” or  
413 reticulospinal, neurons. For example, in 1859, Mauthner cells were identified in fish, where they  
414 were found to initiate turning movement (Sillar, 2016). Chx10 neurons in the *Xenopus* reticular  
415 formation are involved in initiating bouts of swimming (Li and Soffe, 2019). In cats, neurons in  
416 the GRN can initiate postural changes or locomotion (see: Mori, 1987), and they have several  
417 roles in mice (vide supra).

418 Optogenetic experiments have been used to sort out the role of reticular formation  
419 neurons. But one problem with this approach is that activating a population as a whole may  
420 obscure the role of more precisely defined sub-populations. For example, low doses of light  
421 would be expected to excite the lower rheobase neurons (interneurons), which would in turn

422 activate the RSNs. Higher doses of light may excite both, but this could conceal the role of  
423 discrete sub-populations. One way to parse function would be to record the activity of these  
424 neurons during behaviour. It has recently been found that about one half of Chx10 neurons in the  
425 GRN are active during locomotor stop events, but even within these neuronal sub-populations,  
426 there seems to be some diversity in function: that is, individual neurons are not active during  
427 every stop event (Schwenkgrub et al., 2020). Furthermore, some Chx10 neurons were active at  
428 the onset of and during locomotion (Schwenkgrub et al., 2020), consistent with some of them  
429 receiving input from the mesencephalic locomotor region (Bretzner and Brownstone, 2013).  
430 And some are not active during locomotion, but are during grooming, or when the animal is  
431 stationary (Schwenkgrub et al., 2020). Similarly, three functional types of glutamatergic neurons  
432 were described in the lamprey, in a similar region of the reticular formation (one that receives  
433 inputs from the mesencephalic locomotor region). Each of these neuronal types has a distinct  
434 function: initiation, maintenance or stopping swimming (Juvin et al., 2016; Gratsch et al., 2019).  
435 That is, it is clear that reticular formation (GRN) neurons have diverse functions in behaviour.

436         Less attention has been paid to local circuitry in the GRN. Local inhibitory circuits could  
437 facilitate bilateral coordination, as in Mauthner cells (Shimazaki et al., 2019), or could  
438 conceivably aid in tuning descending commands. But the role of local excitatory interneurons is  
439 not obvious. Indeed, these neurons could form a positive feedback loop, leading to unwanted  
440 oscillatory behaviour.

441         Perhaps insight on the role of these interneurons could be gleaned through comparison  
442 with spinal circuits. In the spinal cord, several populations of excitatory interneurons are  
443 necessary for the production of normal coordinated activity, such as locomotion (see: Kiehn,  
444 2016). If the GRN was simply for integration of descending inputs from various movement  
445 centres to produced descending commands, then local inhibitory interneurons may be sufficient  
446 to tune the commands. But if the GRN plays a role in the selection and/or *generation* of complex  
447 movement, then local circuitry – including excitatory interneurons – may be required. It is  
448 interesting that activating Chx10 interneurons led to changes in RSN properties: firing rates in  
449 RSNs were higher than could be elicited by current injection, suggesting that dendritic inputs  
450 could drive these cells into a nonlinear range, as has been observed in other neurons such as

451 spinal motoneurons (Heckman et al., 2003). That is, interneuronal activity could change the  
452 nature of the descending commands – for example, sculpting tonic to phasic activity.

453         Several studies have modeled the internal organization of the reticular formation and its  
454 selection of appropriate RSNs for a motor behaviour (Humphries et al., 2006, 2007). It has been  
455 suggested that local nodes of small interneurons (although in their case inhibitory) form synapses  
456 with reticulospinal neurons, and are organized through connections with other nearby  
457 interneurons within their node. This “small-world” network was hypothesized to ensure rapid  
458 cross-network synchronization, consistent node selection for a particular motor action, and  
459 increased persistent activity that facilitates ongoing drive required for the appropriate motor  
460 response (Humphries et al., 2007). These properties were proposed to be consistent with a role  
461 of the GRN in action selection (Humphries et al., 2005), . Although these models used inhibitory  
462 interneurons, the concept of small-world networks may be generalizable to the architecture that  
463 we have demonstrated here. (The interested reader is directed to the clear analysis of Humphries  
464 et al., 2007, for further reading.)

465         In summary, we have shown that there are at least two distinct subtypes of Chx10<sup>ON</sup>  
466 neurons in the GRN: a local interneuronal and a reticulospinal population. And we have shown  
467 connectivity between these, such that the interneurons enhance the firing of reticulospinal  
468 neurons. We do not yet know how these circuits function to produce behaviour, although we can  
469 propose that these local circuits are important for ensuring that the actions selected by higher  
470 motor circuits are processed to ensure that spinal circuits produce those behaviours.

471 **FIGURE LEGENDS**

472 **Figure 1. Chx10 neurons have two distinct types of electrophysiological properties.**

473 **A)** In response to incremental depolarizing current steps, Type 1 Chx10 neurons demonstrate  
474 minimal gain in their firing rate with little spike frequency adaptation, whereas Type 2 Chx10  
475 neurons demonstrate a high initial firing rate with SFA. **B)** Frequency-current relationship plots  
476 of the initial and average firing rates for Type 1 and Type 2 Chx10 neurons. **C)** Relationship of  
477 initial f-I slope with input resistance and rheobase. Colour reflects the f-I gain (Hz/10 pA; see  
478 sidebar), as does size. **D)** In response to incremental hyperpolarizing current steps, Type 1 Chx10  
479 neurons demonstrate minimal sag and no PIR, whereas Type 2 Chx10 neurons demonstrate  
480 substantial Sag and PIR following termination of the hyperpolarizing pulse. **E)** 3D plot showing  
481 the sag voltage, rheobase and input resistance recorded from each Chx10 neuron. Blue circles  
482 showing separation of Type 1 and Type 2 Chx10 neurons based on their plotted  
483 electrophysiological properties. The neurons indicated by the 2 red dots are shown in Figure 5.

484 **Figure 2. Large Chx10 neurons are reticulospinal neurons.**

485 **A1)** Schematic of experimental procedure in which CTB is injected bilaterally in the second  
486 lumbar segment to label reticulospinal neurons. **A2)** Image of GFP positive Chx10 neurons in  
487 the gigantocellular region of the medulla. **A3)** Image of CTB labelling of terminals and cell  
488 bodies in the same section as A2. **A4)** Overlap of GFP and CTB, with two Chx10 neurons  
489 positive for CTB labelling (arrows), and one smaller one that is not. **B)** Overlaid cumulative  
490 plots demonstrating the relative distribution of all labelled GFP Chx10 neurons in the GRN (light  
491 blue), as well as the relative distribution of CTB positive Chx10 neurons (pink). Note that  
492 although the frequency of large Chx10 cells is lower, it is these large cells that are reticulospinal.

493 **Figure 3. Chx10 interneurons form synapses with other Chx10 interneurons.**

494 **A)** Direct holographic stimulation over patched cell results in single or multiple action potentials,  
495 dependent on the laser output. **B)** Fluorescence image of Chx10::eGFP positive neurons in the  
496 rostral GRN. Synaptic connectivity was determined by stimulating visually identified Chx10  
497 interneurons and recording post-synaptic potentials in the patched Chx10 interneuron. **C)** Post

498 synaptic responses from stimulation of Chx10 interneurons with corresponding numbers in panel  
499 B. In this example, stimulation (trains) of neurons IV and VII elicited EPSPs, whereas  
500 stimulation of the other Chx10 neurons did not. Blue arrows indicates laser on. Example from  
501 n= 20 connections.

502 **Figure 4. Chx10 interneurons form synapses with Chx10 reticulospinal neurons.**

503 **A)** Direct holographic stimulation of patched RSN results in EPSPs or single action potentials  
504 dependent on laser output. **B)** Fluorescence image of Chx10::eGFP positive neurons in the rostral  
505 medulla. Synaptic connectivity was determined by stimulating visually identified Chx10  
506 interneurons and recording post-synaptic potentials in the patched Chx10 RSN. **C)** Post synaptic  
507 responses from stimulation of numbered Chx10 interneurons. In this example, spot V elicited  
508 EPSPs from a train of laser stimuli, whereas stimulation of the remaining Chx10 neurons did not  
509 elicit a response. **D)** After establishing a synaptic connection, a second electrode was used to  
510 patch and recorded responses in the Chx10 interneuron (spot V). **E)** Photostimulation of the  
511 Chx10 interneuron resulted in multiple action potentials and post synaptic EPSP in the Chx10  
512 reticulospinal neuron. **F)** Photostimulation of the Chx10 reticulospinal neuron elicited multiple  
513 action potentials but did not elicit a response in the Chx10 interneuron. Blue arrows indicate  
514 laser on. Example from n= 32 connections.

515 **Figure 5. Bi-directional connectivity between a sub-set of Chx10 interneurons and Chx10**  
516 **reticulospinal neurons.**

517 **A)** Fluorescence image of Chx10::eGFP positive neurons in the rostral GRN. Synaptic  
518 connectivity was determined by stimulating visually identified Chx10 interneurons whilst  
519 recording post-synaptic potentials in the patched Chx10 RSN. **B)** Photostimulation of neuron 1  
520 elicited EPSPs that summated to produce an action potential in the RSN. After establishing this  
521 synaptic connection, a second electrode was used to patch and record responses in the Chx10  
522 interneuron (neuron 1). Note that electrophysiological properties of these 2 neurons are shown by  
523 the red dots in Figure 1E. **C)** Depolarizing current injections in the Chx10 interneuron resulted in  
524 action potentials in the Chx10 interneuron (red) and EPSPs and action potentials in the Chx10  
525 RSN (black) at low and high current intensities, respectively. **D)** Similarly, depolarizing current

526 injections in the Chx10 RSN resulted in action potentials in the Chx10 RSN, and EPSPs and  
527 action potentials in the Chx10 interneuron at low and high current intensities, respectively. **E)**  
528 Hyperpolarizing current injections in the Chx10 interneuron resulted in a small hyperpolarizing  
529 response in the Chx10 RSN. **F)** Hyperpolarizing current injections in the Chx10 RSN did not  
530 elicit a detectable response in the Chx10 interneuron. Note that the RSN could only be stably  
531 hyperpolarized by ~25 mV. Example from n=3 dual patch recordings.

532 **Figure 6. Chx10 interneurons mediate the excitability of Chx10 reticulospinal neurons.**

533 **A)** A Chx10 RSN (inset showing patched neuron) was subjected to ramp current injections  
534 (bottom trace) without (black trace) and with (red and blue traces) photostimulation of a  
535 connected Chx10 interneuron (inset, blue arrow). In the middle trace (red), the photostimulation  
536 began later and lasted a shorter period of time than in the top trace (blue). The firing rate of the  
537 RSN was plotted with and without photostimulation (top trace). **B)** Same connected Chx10  
538 interneuron photostimulated (shaded blue) during sustained depolarizing current injection into  
539 the Chx10 RSN, with the resulting firing rate shown in the top trace. Example from n= 3 cells.

540 **REFERENCES**

- 541
- 542 Bikoff JB, Gabitto MI, Rivard AF, Drobac E, Machado TA, Miri A, Brenner-Morton S,  
543 Famojure E, Diaz C, Alvarez FJ, Mentis GZ, Jessell TM (2016) Spinal Inhibitory  
544 Interneuron Diversity Delineates Variant Motor Microcircuits. *Cell* 165:207-219.
- 545 Borowska J, Jones CT, Zhang H, Blacklaws J, Goulding M, Zhang Y (2013) Functional  
546 subpopulations of V3 interneurons in the mature mouse spinal cord. *J Neurosci*  
547 33:18553-18565.
- 548 Bouvier J, Caggiano V, Leiras R, Caldeira V, Bellardita C, Balueva K, Fuchs A, Kiehn O (2015)  
549 Descending Command Neurons in the Brainstem that Halt Locomotion. *Cell* 163:1191-  
550 1203.
- 551 Bretzner F, Brownstone RM (2013) Lhx3-Chx10 reticulospinal neurons in locomotor circuits. *J*  
552 *Neurosci* 33:14681-14692.
- 553 Capelli P, Pivetta C, Soledad Esposito M, Arber S (2017) Locomotor speed control circuits in the  
554 caudal brainstem. *Nature* 551:373-377.
- 555 Chopek JW, Nascimento F, Beato M, Brownstone RM, Zhang Y (2018) Sub-populations of  
556 Spinal V3 Interneurons Form Focal Modules of Layered Pre-motor Microcircuits. *Cell*  
557 *Rep* 25:146-156 e143.
- 558 Cregg JM, Leiras R, Montalant A, Wanken P, Wickersham IR, Kiehn O (2020) Brainstem  
559 neurons that command mammalian locomotor asymmetries. *Nat Neurosci* 23:730-740.
- 560 Crone SA, Viemari JC, Droho S, Mrejeru A, Ramirez JM, Sharma K (2012) Irregular Breathing  
561 in Mice following Genetic Ablation of V2a Neurons. *J Neurosci* 32:7895-7906.
- 562 Dougherty Kimberly J, Zagoraïou L, Satoh D, Rozani I, Doobar S, Arber S, Jessell Thomas M,  
563 Kiehn O (2013) Locomotor Rhythm Generation Linked to the Output of Spinal Shox2  
564 Excitatory Interneurons. *Neuron* 80:920-933.
- 565 Du Beau A, Shakya Shrestha S, Bannatyne BA, Jalicy SM, Linnen S, Maxwell DJ (2012)  
566 Neurotransmitter phenotypes of descending systems in the rat lumbar spinal cord.  
567 *Neuroscience* 227:67-79.
- 568 Gratsch S, Auclair F, Demers O, Auguste E, Hanna A, Buschges A, Dubuc R (2019) A  
569 Brainstem Neural Substrate for Stopping Locomotion. *J Neurosci* 39:1044-1057.
- 570 Hayashi M, Hinckley CA, Driscoll SP, Moore NJ, Levine AJ, Hilde KL, Sharma K, Pfaff SL  
571 (2018) Graded Arrays of Spinal and Supraspinal V2a Interneuron Subtypes Underlie  
572 Forelimb and Hindlimb Motor Control. *Neuron* 97:869-884 e865.
- 573 Heckman CJ, Lee RH, Brownstone RM (2003) Hyperexcitable dendrites in motoneurons and  
574 their neuromodulatory control during motor behavior. *Trends Neurosci* 26:688-695.
- 575 Humphries MD, Gurney K, Prescott TJ (2005) Action selection in a macroscopic model of the  
576 brainstem reticular formation. In: *Modelling natural action selection* (Bryson JJ, Prescott  
577 TJ, Seth AK, eds). Brighton, UK: AISB Press.
- 578 Humphries MD, Gurney K, Prescott TJ (2006) The brainstem reticular formation is a small-  
579 world, not scale-free, network. *Proceedings of the Royal Society B: Biological Sciences*  
580 273:503-511.
- 581 Humphries MD, Gurney K, Prescott TJ (2007) Is there a brainstem substrate for action selection?  
582 *Philosophical Transactions of the Royal Society B: Biological Sciences* 362:1627-1639.
- 583 Jensen VN, Seedle K, Turner SM, Lorenz JN, Crone SA (2019) V2a Neurons Constrain  
584 Extradaphragmatic Respiratory Muscle Activity at Rest. *eNeuro* 6.



- 585 Jordan LM, Liu J, Hedlund PB, Akay T, Pearson KG (2008) Descending command systems for  
586 the initiation of locomotion in mammals. *Brain Res Rev* 57:183-191.
- 587 Juvin L, Gratsch S, Trillaud-Doppia E, Gariépy JF, Buschges A, Dubuc R (2016) A Specific  
588 Population of Reticulospinal Neurons Controls the Termination of Locomotion. *Cell Rep*  
589 15:2377-2386.
- 590 Kiehn O (2016) Decoding the organization of spinal circuits that control locomotion. *Nature*  
591 *Reviews Neuroscience* 17:224-238.
- 592 Lee J, Wang W, Sabatini BL (2020) Anatomically segregated basal ganglia pathways allow  
593 parallel behavioral modulation. *Nat Neurosci* 23:1388-1398.
- 594 Lemieux M, Bretzner F (2019) Glutamatergic neurons of the gigantocellular reticular nucleus  
595 shape locomotor pattern and rhythm in the freely behaving mouse. *PLoS Biol*  
596 17:e2003880.
- 597 Li WC, Soffe SR (2019) Stimulation of Single, Possible CHX10 Hindbrain Neurons Turns  
598 Swimming On and Off in Young *Xenopus* Tadpoles. *Front Cell Neurosci* 13:47.
- 599 Lundfald L, Restrepo CE, Butt SJB, Peng C-Y, Droho S, Endo T, Zeilhofer HU, Sharma K,  
600 Kiehn O (2007) Phenotype of V2-derived interneurons and their relationship to the axon  
601 guidance molecule EphA4 in the developing mouse spinal cord. *European Journal of*  
602 *Neuroscience* 26:2989-3002.
- 603 Martin EM, Devidze N, Shelley DN, Westberg L, Fontaine C, Pfaff DW (2011) Molecular and  
604 neuroanatomical characterization of single neurons in the mouse medullary  
605 gigantocellular reticular nucleus. *J Comp Neurol* 519:2574-2593.
- 606 Matsuyama K, Nakajima K, Mori F, Aoki M, Mori S (2004) Lumbar commissural interneurons  
607 with reticulospinal inputs in the cat: morphology and discharge patterns during fictive  
608 locomotion. *J Comp Neurol* 474:546-561.
- 609 Mitchell EJ, McCallum S, Dewar D, Maxwell DJ (2016) Corticospinal and Reticulospinal  
610 Contacts on Cervical Commissural and Long Descending Propriospinal Neurons in the  
611 Adult Rat Spinal Cord; Evidence for Powerful Reticulospinal Connections. *PLoS One*  
612 11:e0152094.
- 613 Mori S (1987) Integration of posture and locomotion in acute decerebrate cats and in awake,  
614 freely moving cats. *Progress in Neurobiology* 28:161-195.
- 615 Noga BR, Kettler J, Jordan LM (1988) Locomotion produced in mesencephalic cats by injection  
616 of putative transmitter substances and antagonists into the medial reticular formation and  
617 the pontomedullary locomotor strip. *J Neurosci* 8:2074-2086.
- 618 Noga BR, Kriellaars DJ, Brownstone RM, Jordan LM (2003) Mechanism for activation of  
619 locomotor centres in the spinal cord by stimulation of the mesencephalic locomotor  
620 region. *J Neurophysiol* 90:15.
- 621 Orlovsky GN (1970) Work of the reticulo-spinal neurones during locomotion. *Biofizika* 15:728-  
622 737.
- 623 Peng CY, Yajima H, Burns CE, Zon LI, Sisodia SS, Pfaff SL, Sharma K (2007) Notch and  
624 MAML signaling drives Scl-dependent interneuron diversity in the spinal cord. *Neuron*  
625 53:813-827.
- 626 Pierani A, Moran-Rivard L, Sunshine MJ, Littman DR, Goulding M, Jessell TM (2001) Control  
627 of interneuron fate in the developing spinal cord by the progenitor homeodomain protein  
628 Dbx1. *Neuron* 29:367-384.
- 629

- 630 Romer SH, Seedle K, Turner SM, Li J, Baccei ML, Crone SA (2017) Accessory respiratory  
631 muscles enhance ventilation in ALS model mice and are activated by excitatory V2a  
632 neurons. *Exp Neurol* 287:192-204.
- 633 Saper CB, Fuller PM, Pedersen NP, Lu J, Scammell TE (2010) Sleep state switching. *Neuron*  
634 68:1023-1042.
- 635 Schepens B, Drew T (2004) Independent and convergent signals from the pontomedullary  
636 reticular formation contribute to the control of posture and movement during reaching in  
637 the cat. *J Neurophysiol* 92:2217-2238.
- 638 Schwenkgrub J, Harrell ER, Bathellier B, Bouvier J (2020) Deep imaging in the brainstem  
639 reveals functional heterogeneity in V2a neurons controlling locomotion. *Sci Adv* 6.
- 640 Shimazaki T, Tanimoto M, Oda Y, Higashijima SI (2019) Behavioral Role of the Reciprocal  
641 Inhibition between a Pair of Mauthner Cells during Fast Escapes in Zebrafish. *J Neurosci*  
642 39:1182-1194.
- 643 Sillar KT (2016) *The neuroethology of predation and escape*. Hoboken, New Jersey: Wiley  
644 Blackwell.
- 645 Takakusaki K (2017) Functional Neuroanatomy for Posture and Gait Control. *Journal of*  
646 *Movement Disorders* 10:1-17.
- 647 Takakusaki K, Kohyama J, Matsuyama K (2003) Medullary reticulospinal tract mediating a  
648 generalized motor inhibition in cats: iii. functional organization of spinal interneurons in  
649 the lower lumbar segments. *Neuroscience* 121:731-746.
- 650 Talpalar AE, Bouvier J, Borgius L, Fortin G, Pierani A, Kiehn O (2013) Dual-mode operation of  
651 neuronal networks involved in left-right alternation. *Nature* 500:85-88.
- 652 Tecuapetla F, Jin X, Lima SQ, Costa RM (2016) Complementary Contributions of Striatal  
653 Projection Pathways to Action Initiation and Execution. *Cell* 166:703-715.
- 654 Usseglio G, Gatier E, Heuzé A, Hérent C, Bouvier J (2020) Control of Orienting Movements and  
655 Locomotion by Projection-Defined Subsets of Brainstem V2a Neurons. *Current Biology*.
- 656 Valencia Garcia S, Brischoux F, Clément O, Libourel P-A, Arthaud S, Lazarus M, Luppi P-H,  
657 Fort P (2018) Ventromedial medulla inhibitory neuron inactivation induces REM sleep  
658 without atonia and REM sleep behavior disorder. *Nature Communications* 9.
- 659 Westberg L, Sawa E, Wang AY, Gunaydin LA, Ribeiro AC, Pfaff DW (2009) Colocalization of  
660 connexin 36 and corticotropin-releasing hormone in the mouse brain. *BMC Neurosci*  
661 10:41.
- 662 Zaaimi B, Dean LR, Baker SN (2018) Different contributions of primary motor cortex, reticular  
663 formation, and spinal cord to fractionated muscle activation. *J Neurophysiol* 119:235-  
664 250.
- 665 Zagoraïou L, Akay T, Martin JF, Brownstone RM, Jessell TM, Miles GB (2009) A cluster of  
666 cholinergic premotor interneurons modulates mouse locomotor activity. *Neuron* 64:645-  
667 662.
- 668 Zhang Y, Narayan S, Geiman E, Lanuza GM, Velasquez T, Shanks B, Akay T, Dyck J, Pearson  
669 K, Gosgnach S, Fan CM, Goulding M (2008) V3 spinal neurons establish a robust and  
670 balanced locomotor rhythm during walking. *Neuron* 60:84-96.
- 671  
672

Figure 1

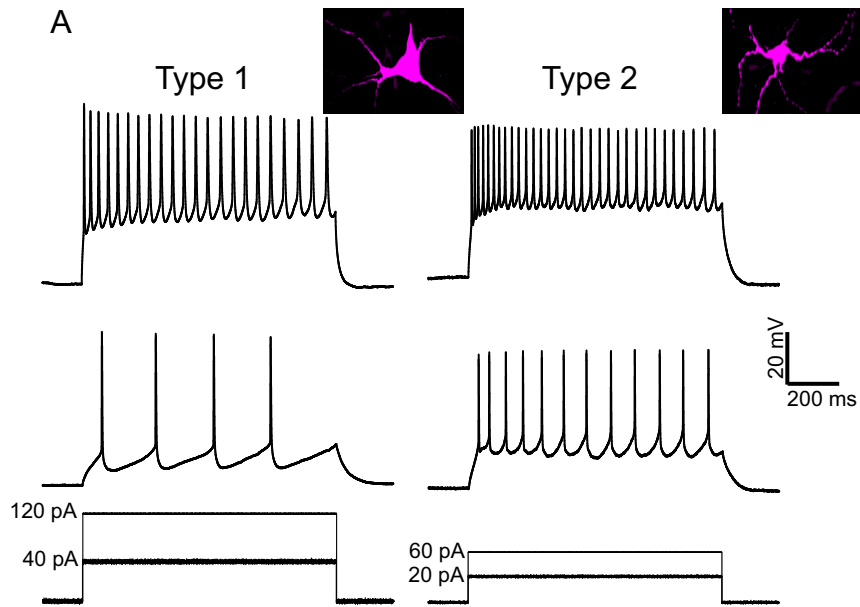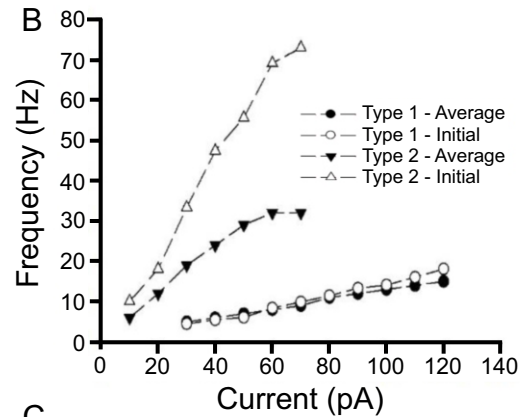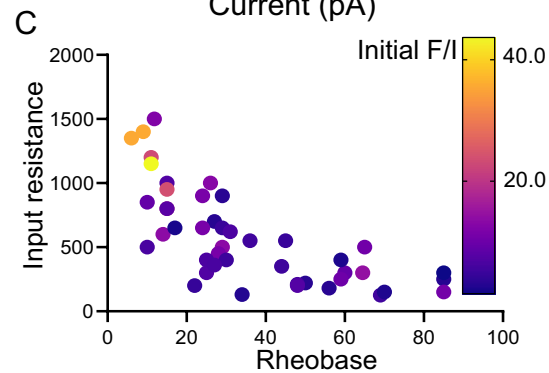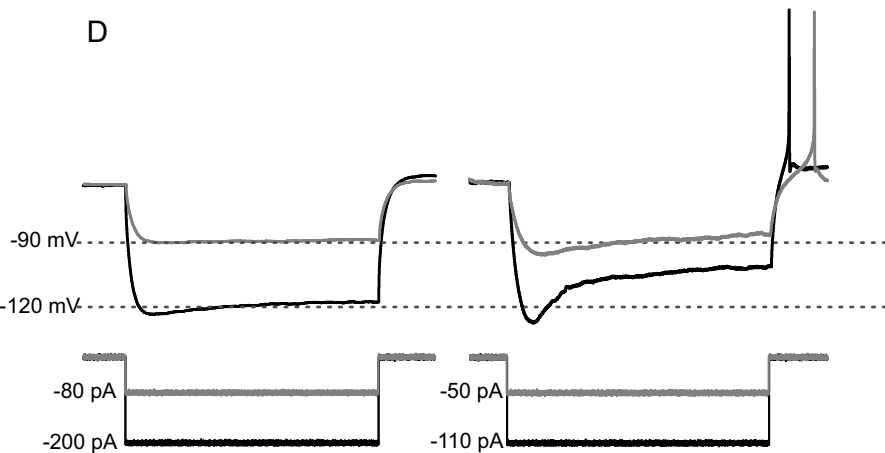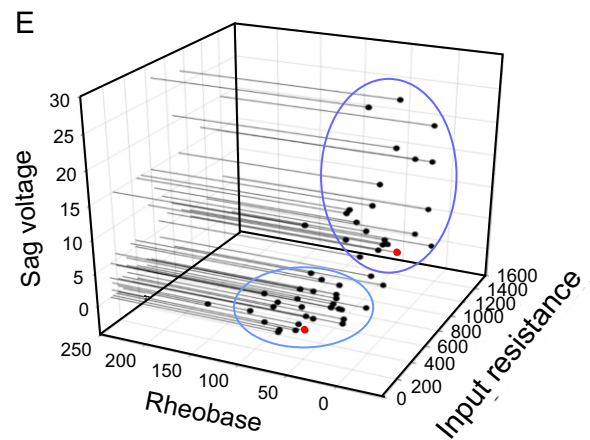

Figure 2

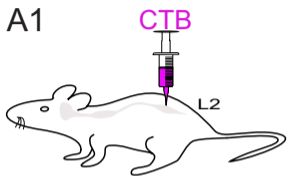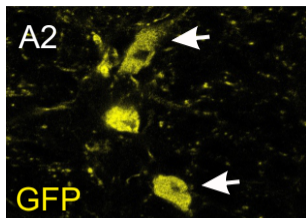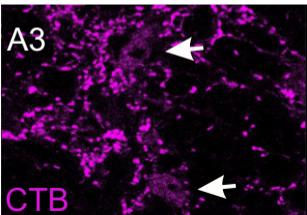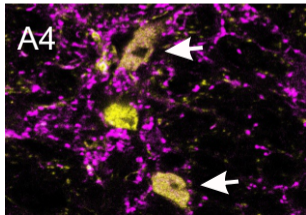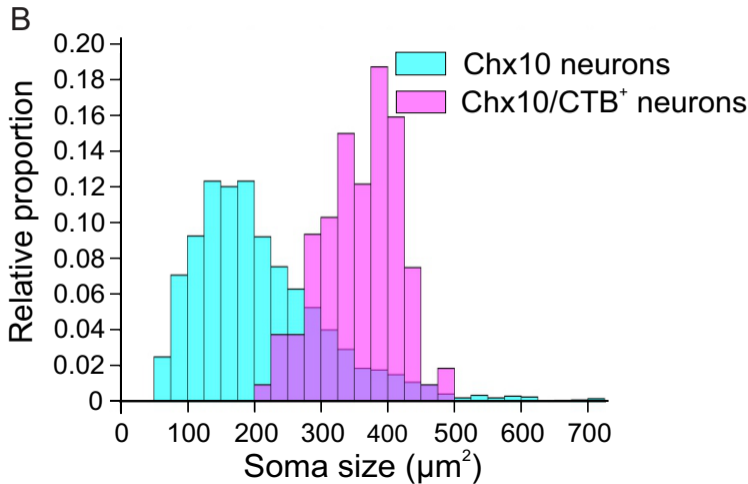

Figure 3

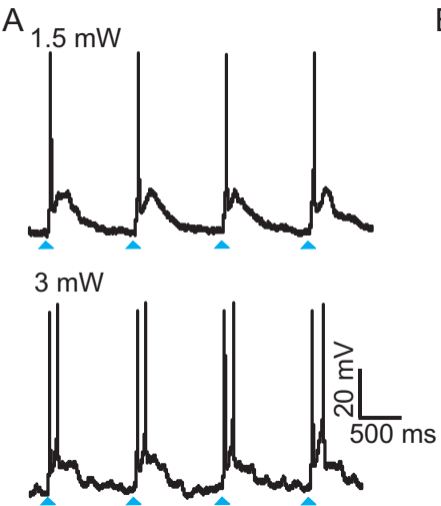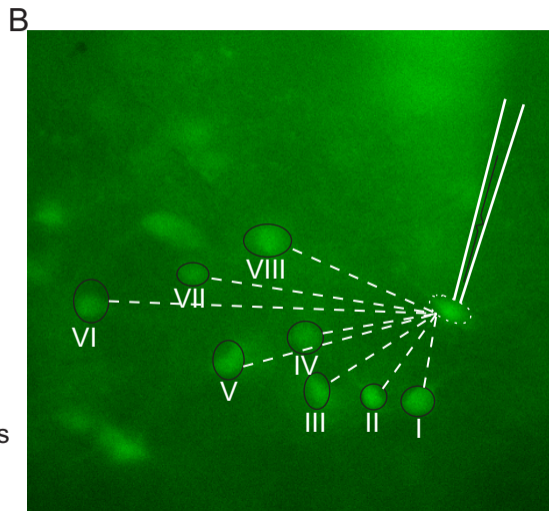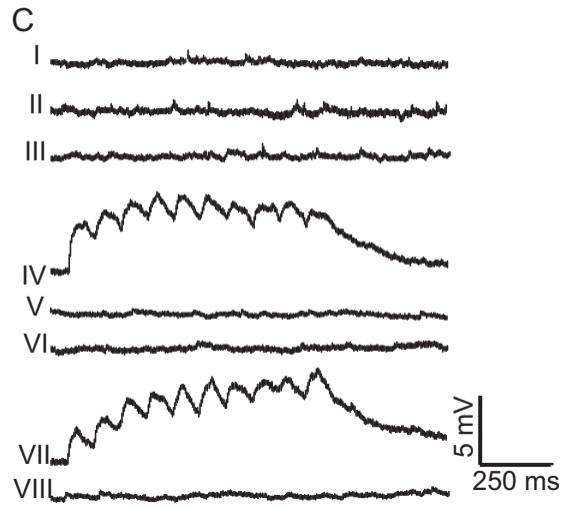

**Figure 4****A**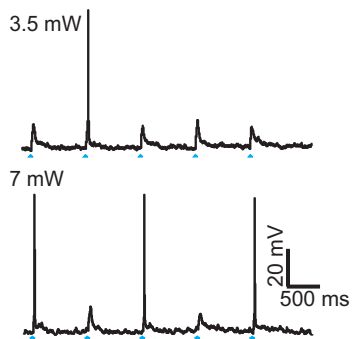**B**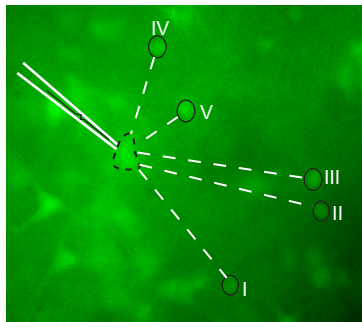**C**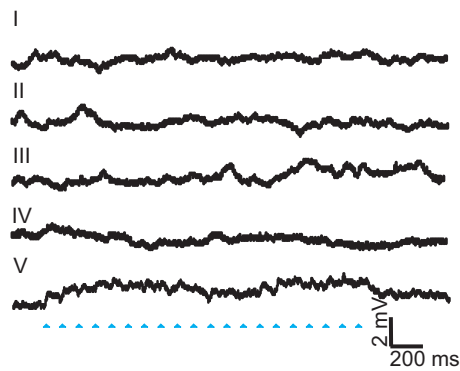**D**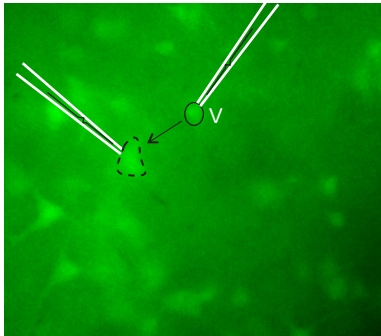**E**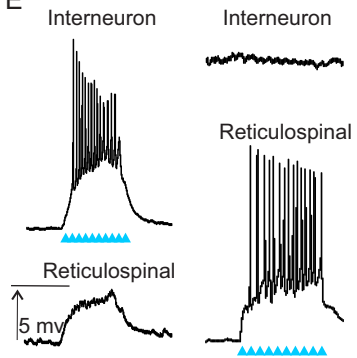

Figure 5

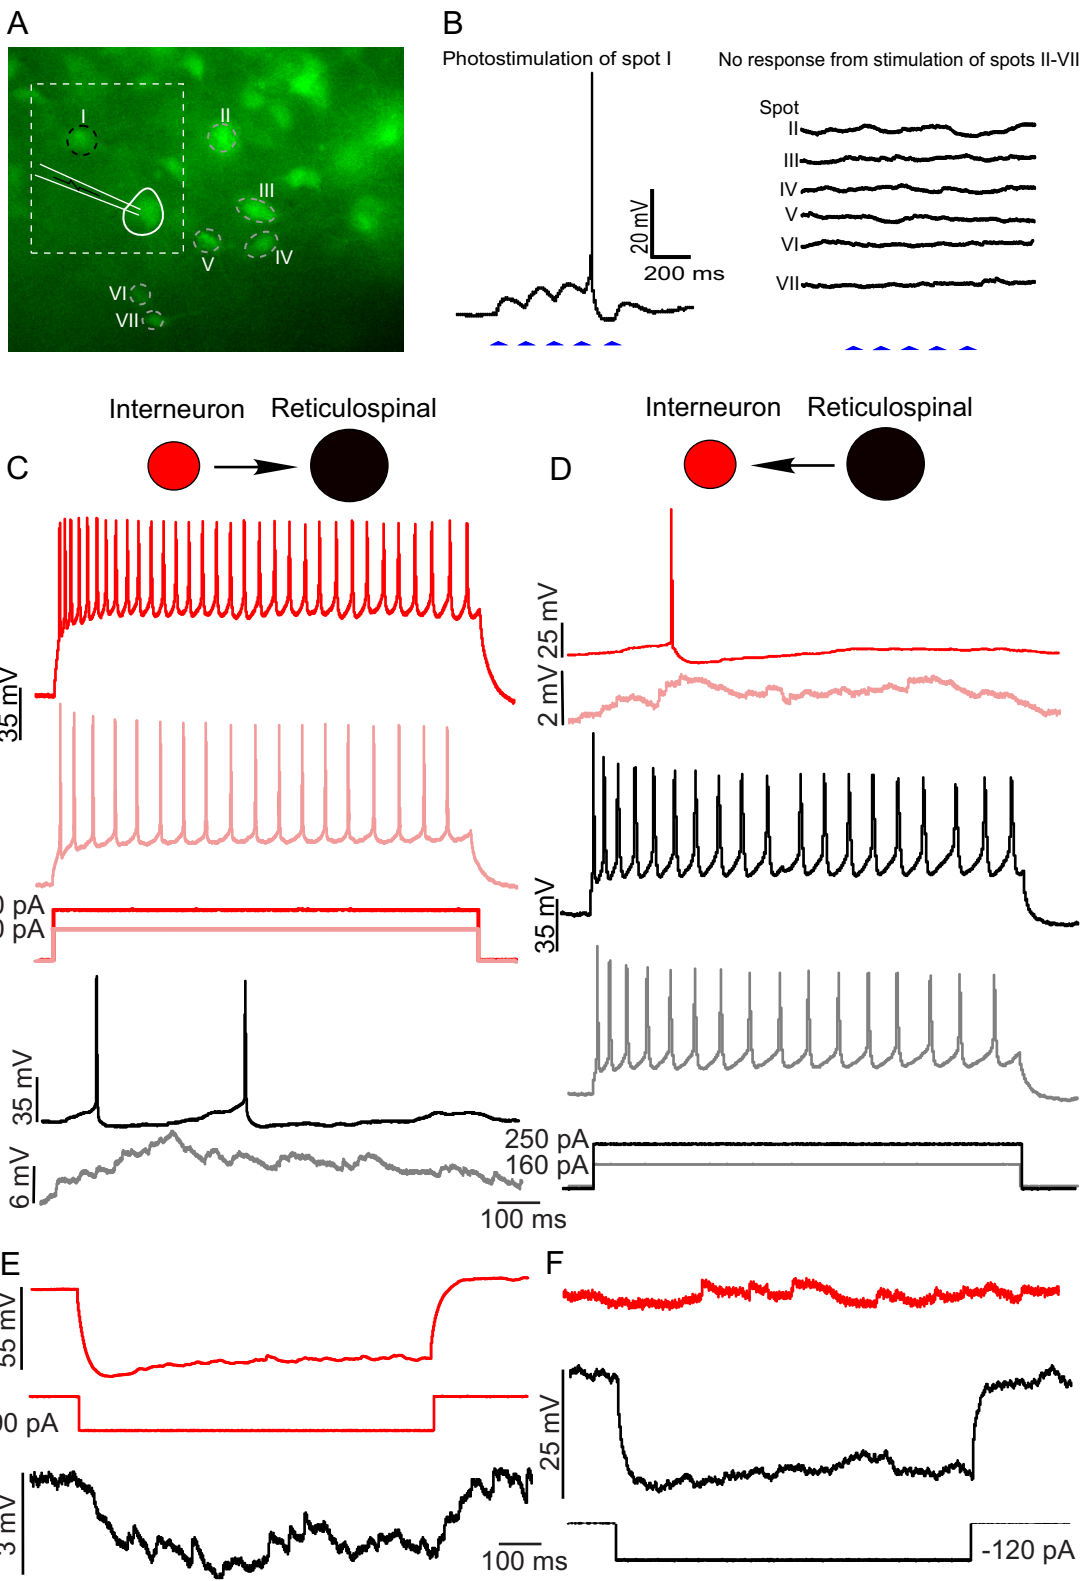

Figure 6

A

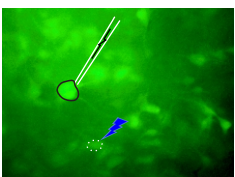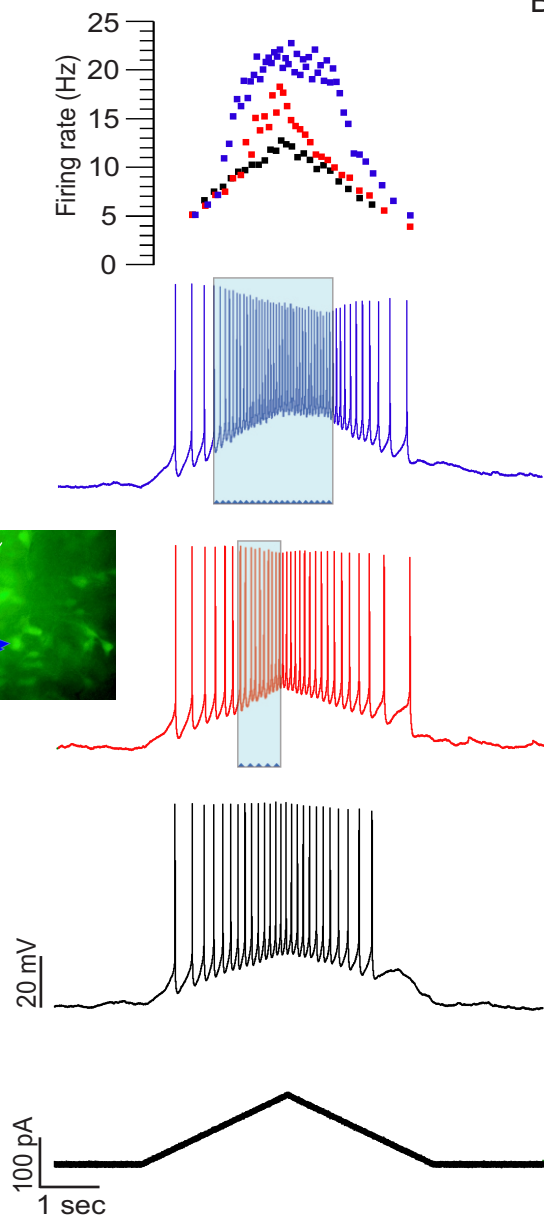

B

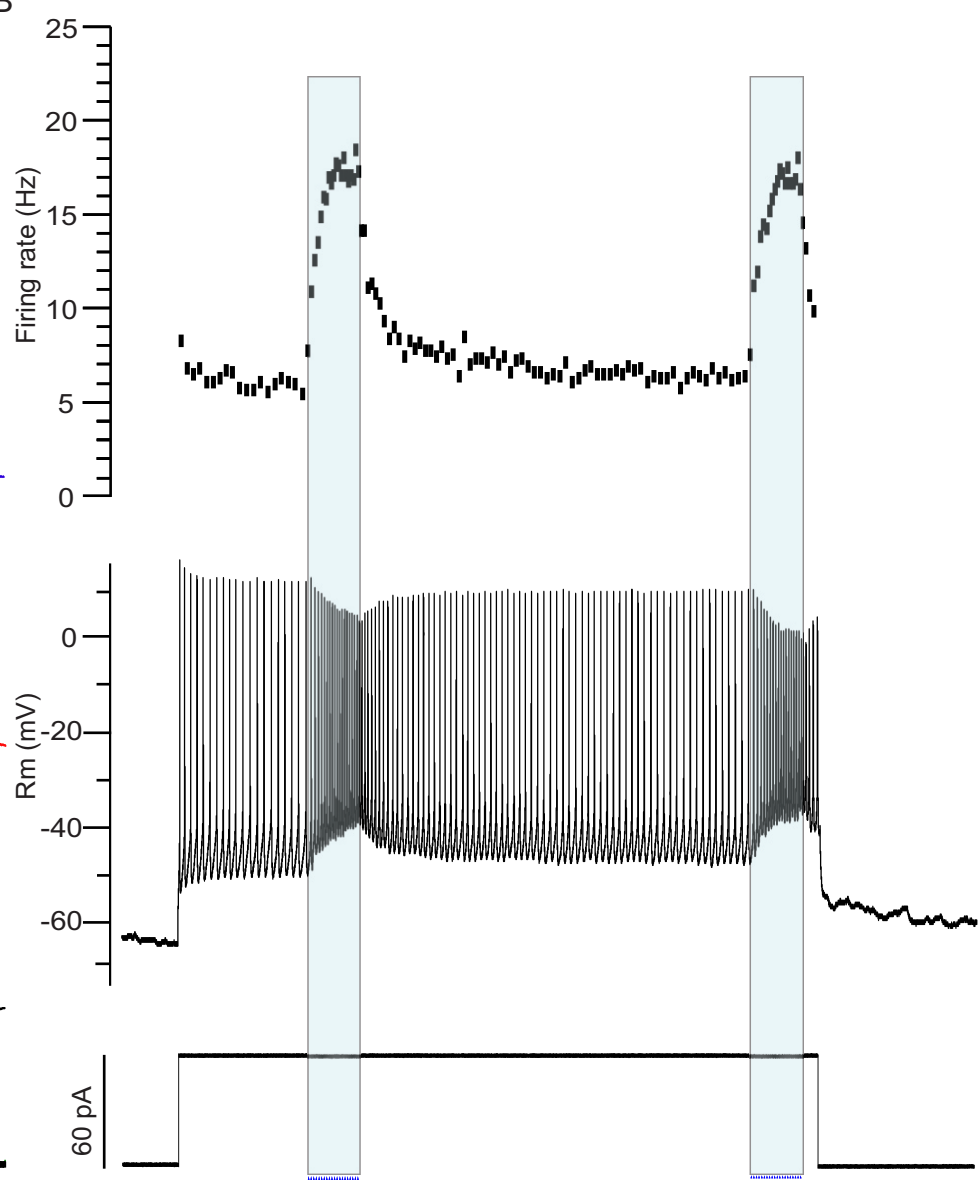

Source: https://www.biorxiv.org/content/10.1101/2021.01.11.426243v1.full.pdf
